# Supplementary material for: Live Cell Imaging Reveals pH Oscillations in Saccharomyces cerevisiae During Metabolic Transitions
Source: PubMed Central journal article supplement (PMC5654966; doi:10.1038/s41598-017-14382-0), 2017-10-24
Supplement: 41598_2017_14382_MOESM1_ESM.pdf [file 41598_2017_14382_MOESM1_ESM.pdf]

1 **Benjamin J. T. Dodd<sup>1</sup> and Joel M. Kralj<sup>1,2\*</sup>**

2 <sup>1</sup>BioFrontiers Institute, and

3 <sup>2</sup>Molecular Cellular and Developmental Biology Department

4 University of Colorado – Boulder, 80303

5

6 \*Corresponding author ([joel.kralj@colorado.edu](mailto:joel.kralj@colorado.edu))

7

8

9 **Live Cell Imaging Reveals pH Oscillations in *Saccharomyces cerevisiae* During Metabolic Transitions**

10

11

12

13

14 **Supplementary Information**

## 15 SUPPLEMENTARY FIGURES

16

17 Figure S1 –

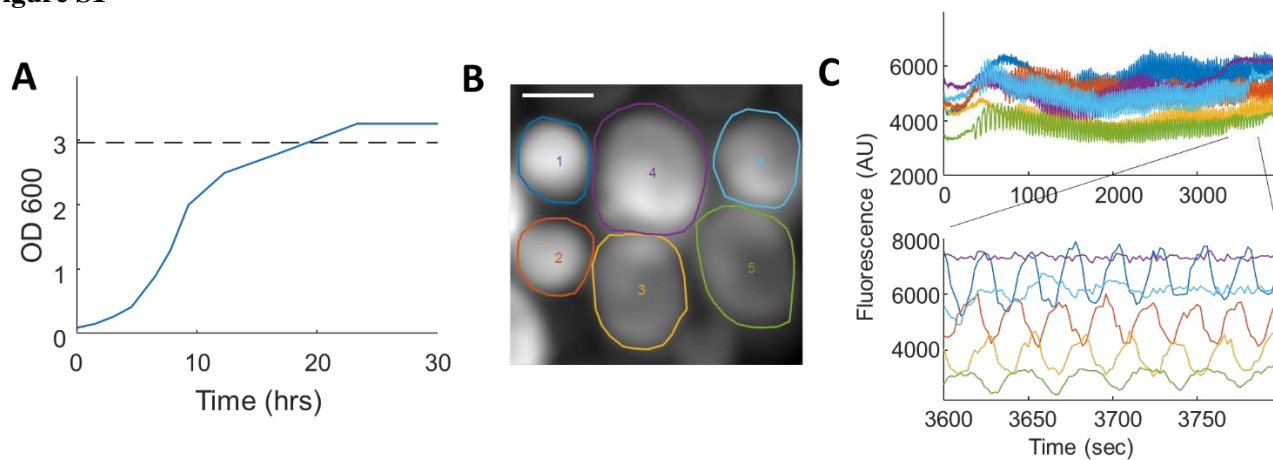

18

19 Figure S1 - (A) Growth curve for yeast cells grown in leucine drop-out medium. Oscillating cells were  
20 typically seen at an OD of ~2-3. (B) Individual cells expressing SEP with manually selected ROIs. Scale  
21 bar is 3  $\mu$ m. (C) Time traces of cells from the same ROI of (B). Each cell oscillates with varying frequency  
22 and phase. The phase of each oscillator does not synchronize within 1 hour of imaging (zoomed region).

23

24 **Figure S2 –**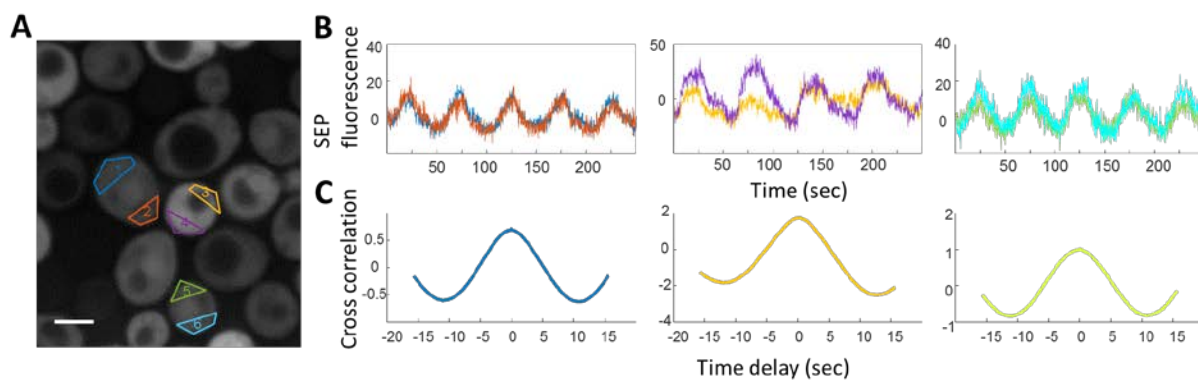

25  
26 Figure S2 – (A) Average image of SEP expressing cells taken on a spinning disk microscope with 100x  
27 objective. Manually selected ROIs on opposite halves of the same cell are represented with different color  
28 lines. Scale bar is 2  $\mu\text{m}$ . (B) Time traces taken at 10 Hz from the corresponding ROI in (A). (C) Cross  
29 correlation of each trace taken in B. The time lag between traces for each cell was at 0 seconds.  
30

31 **Figure S3 -**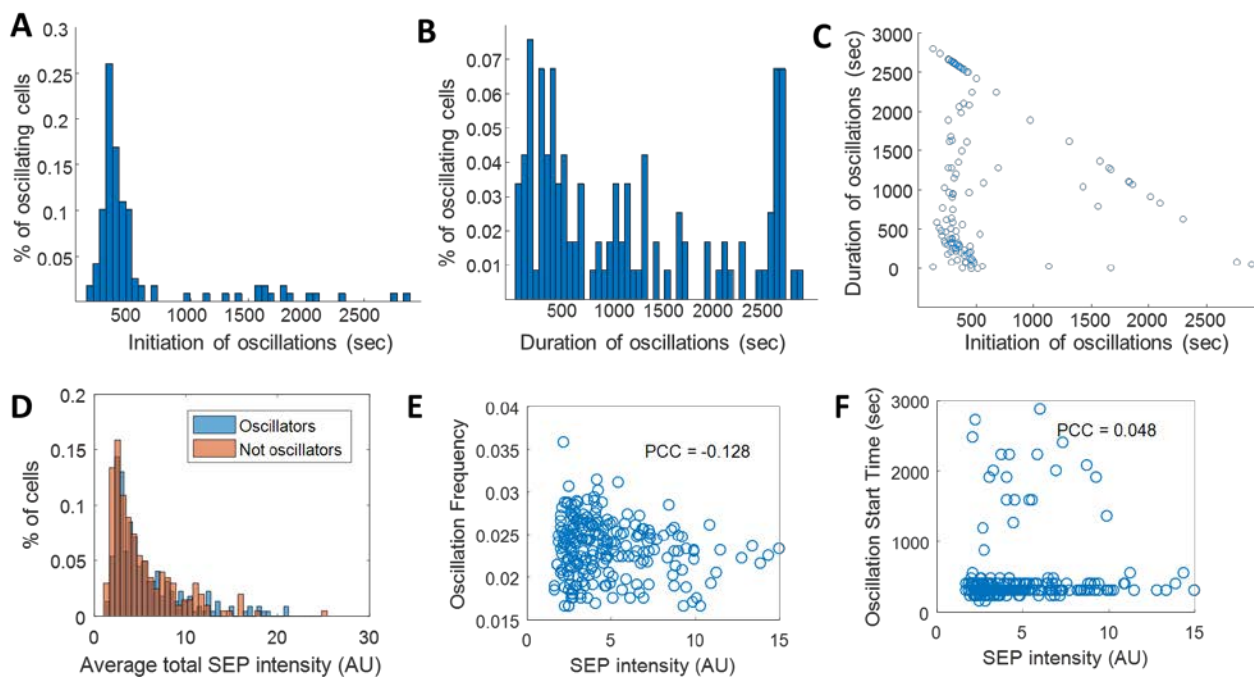

32  
 33  
 34  
 35  
 36  
 37  
 38  
 39  
 40  
 41

Figure S3 - (A) Distribution of the initiation of oscillations after the addition of glucose. (B) Distribution of the duration of oscillations after the addition of glucose. (C) Scatter plot showing the initiation of oscillation as compared to the duration. All cells along the diagonal were oscillating until the end of the recording. (D) Histograms of initial SEP intensity for both oscillators (blue bars) and non-oscillators (red bars). (E) Scatter plot showing low correlation between the mean SEP intensity and the oscillation frequency. (F) Scatter plot showing low correlation between the mean SEP intensity and the oscillation start time.

42 **Figure S4 –**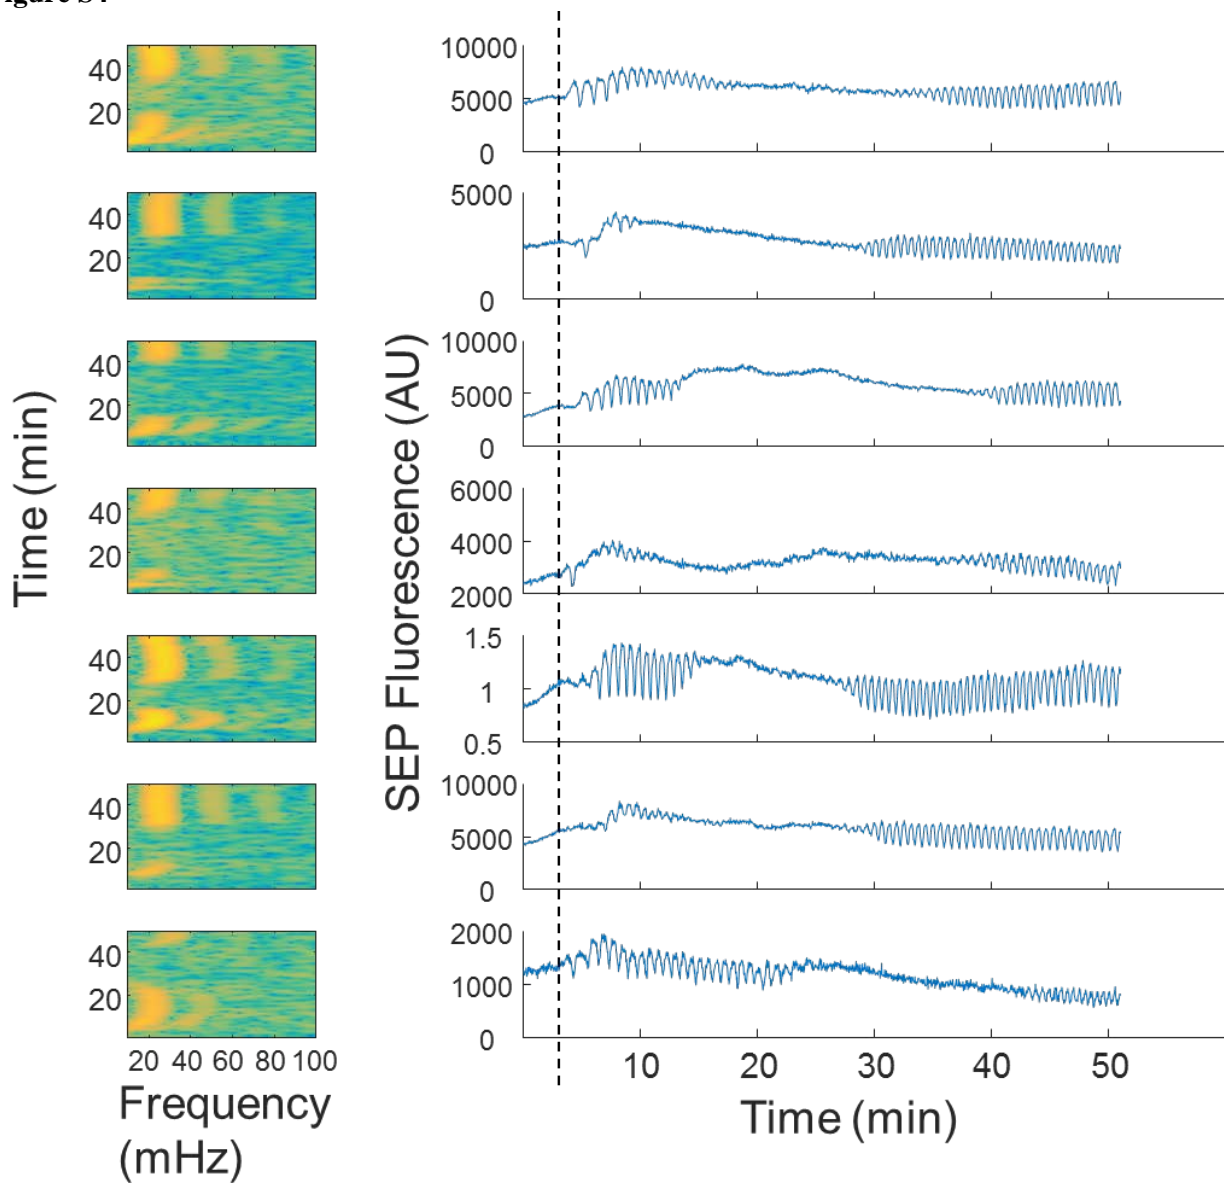

43  
 44  
 45  
 46  
 47  
 48

Figure S4 - Examples of single cells starting oscillations after glucose addition, stopping, and then restarting. (Left) Spectrograms of oscillators and (right) the corresponding time trace. Cells were imaged expressing cytoplasmic SEP. The dashed black line indicates the addition of glucose.

49 **Figure S5 –**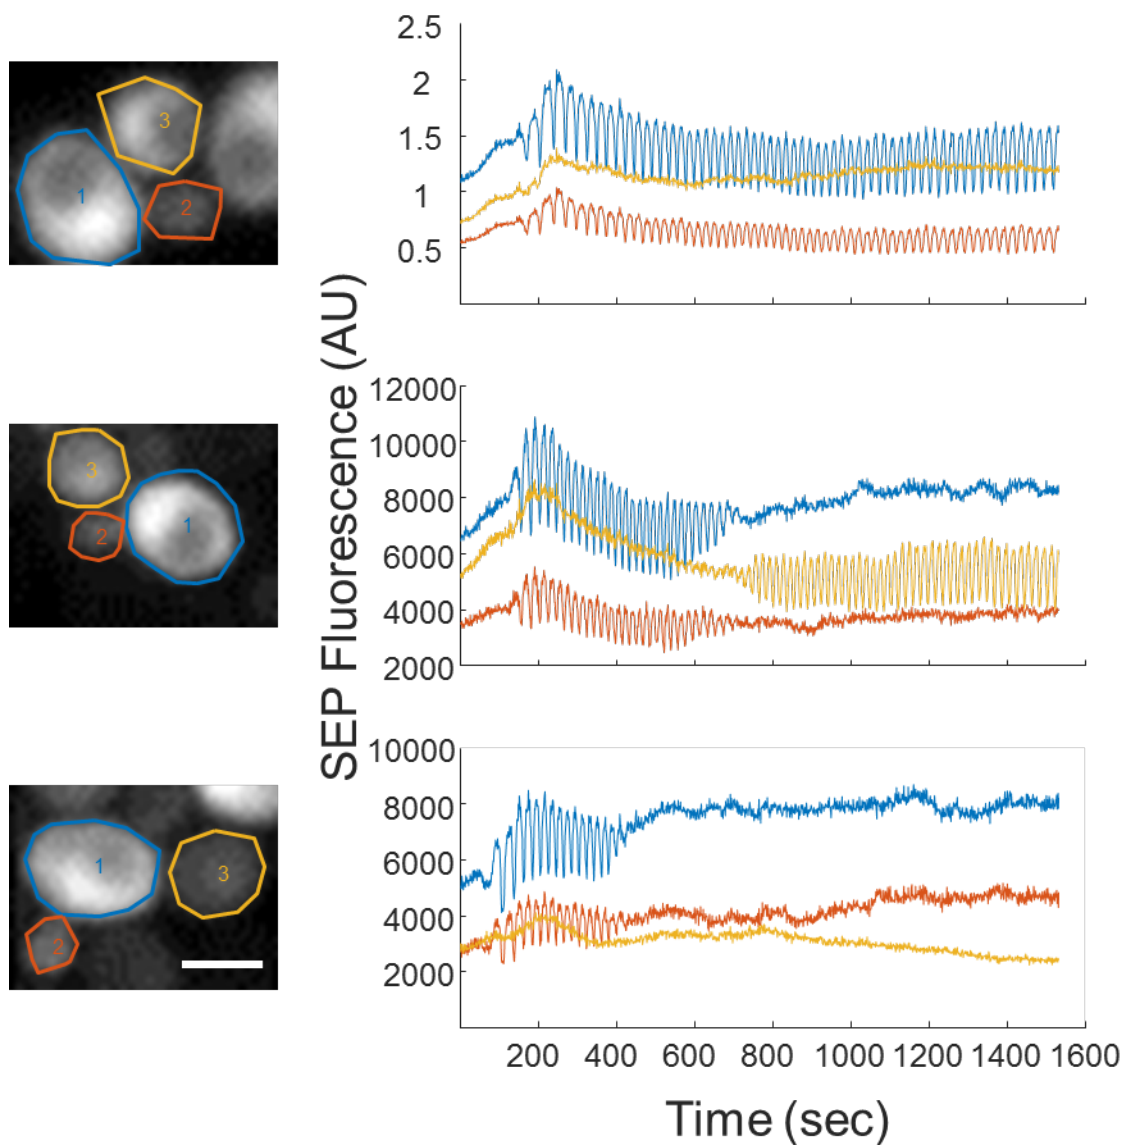

50  
 51 Figure S5 - Examples of budded yeast cells with oscillating pH. (Left) Image of cells expressing SEP with  
 52 manually selected ROIs. Scale bar is 3  $\mu\text{m}$ . Blue – mother cell, red – daughter bud, yellow – neighboring  
 53 cell. (Right) Time traces associated with each ROI in the image. The blue and red traces are in phase, and  
 54 stop and start at the same time, and are uncorrelated with the activity of the neighboring cell (yellow trace).  
 55

56 **Figure S6 –**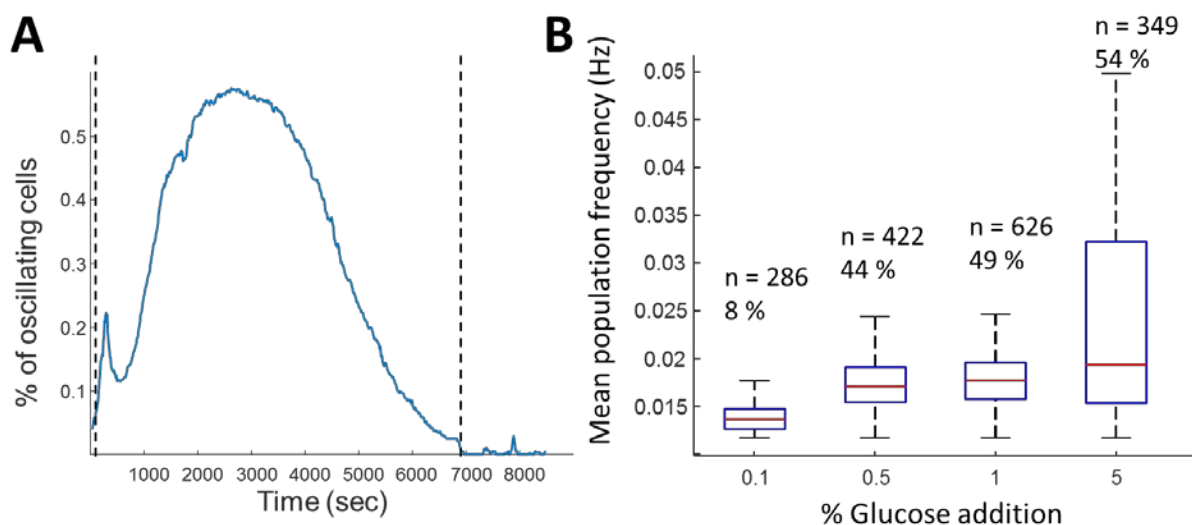

57  
 58 Figure S6 – (A) Oscillations only begin during transition from starvation to glucose. Figure shows the  
 59 percentage of oscillating cells as a function of time after glucose addition (dashed black line). Upon re-  
 60 addition of glucose after 2 hours, no cells started oscillating indicating these oscillations only occur with  
 61 specific pre-treatment of cells. (B) Box plots showing a change in population median frequency with  
 62 increasing external glucose concentration. The median concentration increases 70% from .0139 to .0197  
 63 Hz. Red line indicates median, box indicates 75/25%, and black dashed lines indicate 90/10% of the  
 64 maxima. Outliers were analyzed but not shown. The number of cells for each box and the fraction of  
 65 oscillating cells is shown above.

66

67 **Figure S7 –**

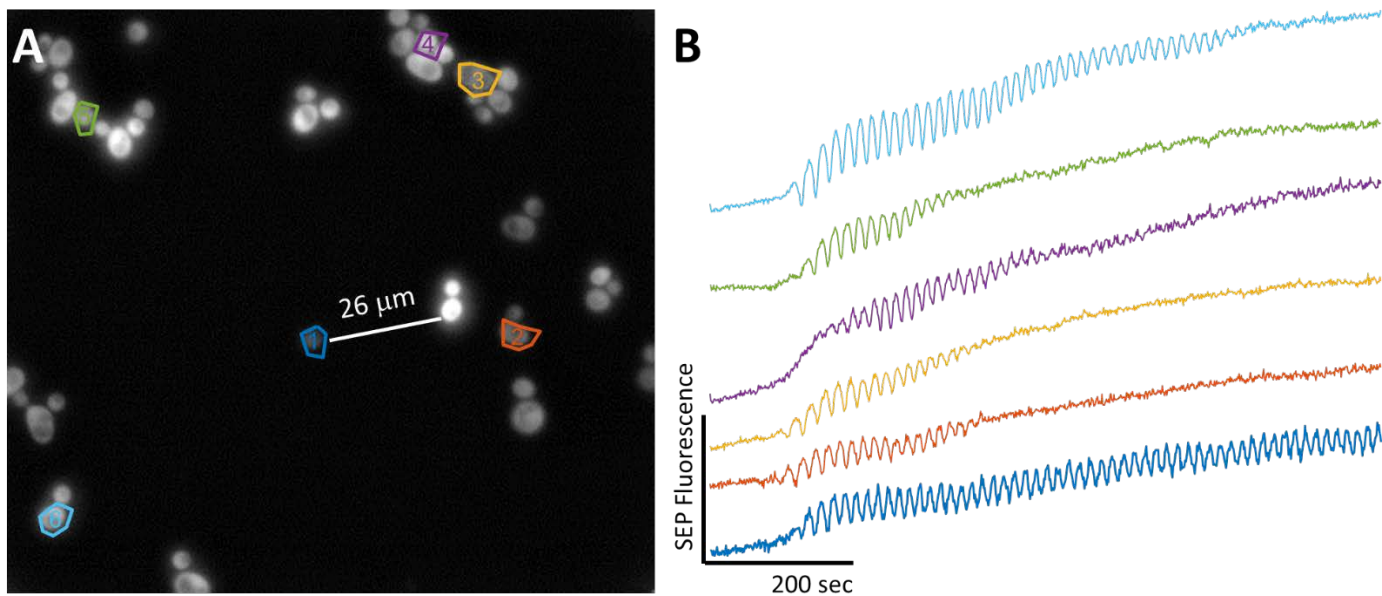

68  
69 Figure S7 - (A) Image of sparsely plated cells expressing cytoplasmic SEP. Each color represents a user  
70 selected ROI. Cell marked with a dark blue line (1) is 26 μm from the closest neighboring cell. (B) Time  
71 traces from each of the corresponding ROIs in (A). The cell marked with the dark blue line shows pH  
72 oscillations, as do many of the distant neighbors.  
73



74 **Figure S8 –**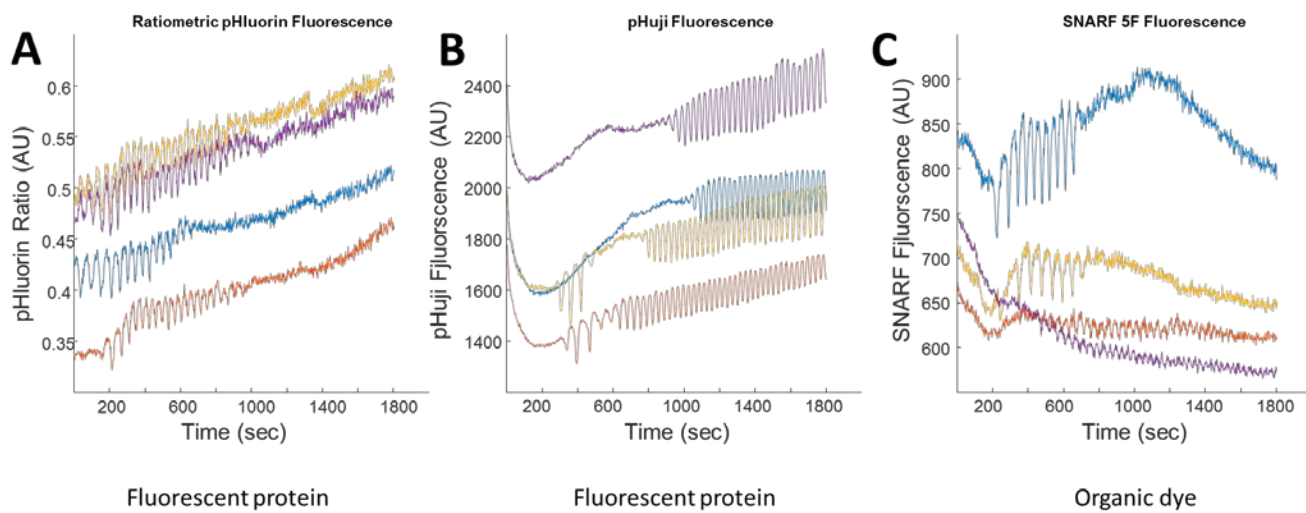

75

76 Figure S8 - Examples of cells showing pH oscillations with different pH indicators (A) ratiometric pHluorin

77 (genetically encoded), (B) pHuji (genetically encoded), and (C) SNARF-5F-AM (organic dye).

78

79 **Figure S9 –**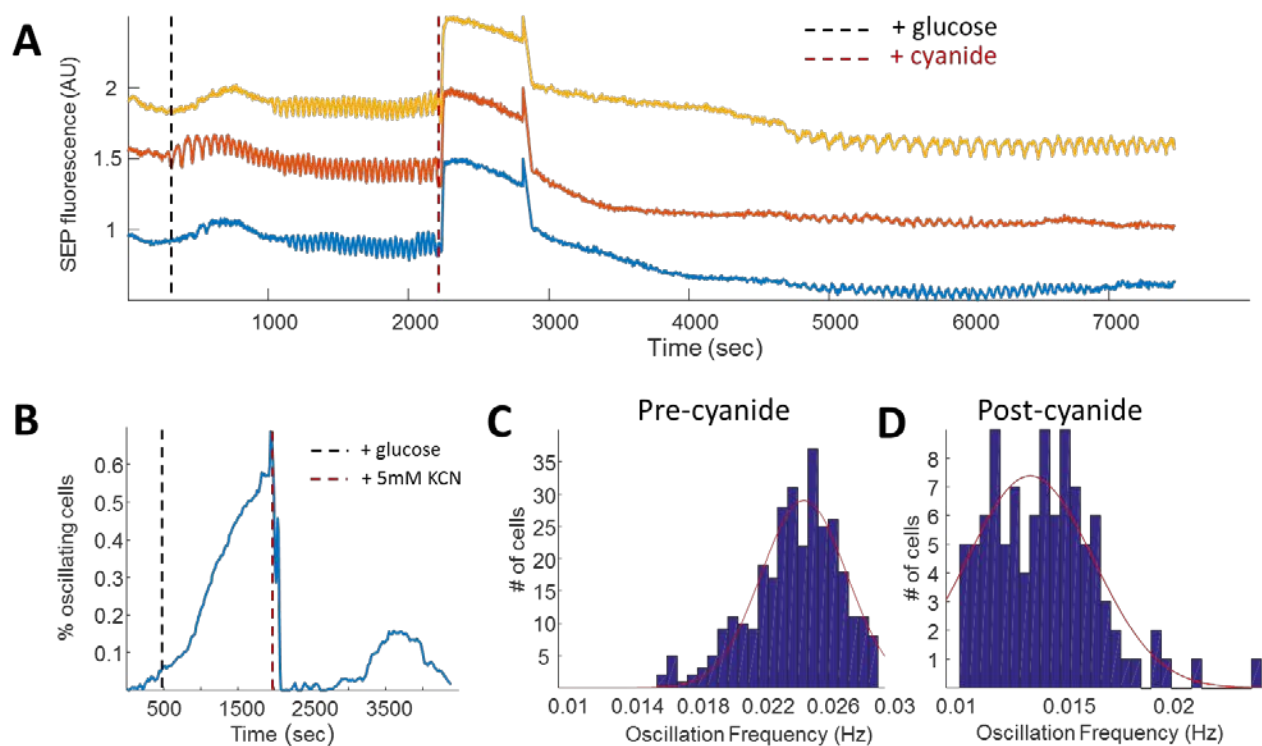80  
81

82 Figure S9 - Addition of cyanide to oscillating cells. (A) Example traces of cells that showed oscillations  
83 before and after addition of cyanide. Glucose addition (black dashed line) caused cells to start oscillating.  
84 Cyanide addition (red dashed line) induced an increase in cytoplasmic pH. Upon recovery, some cells re-  
85 started oscillation, though the amplitude was smaller and they were not synchronized. (B) Percentage of  
86 oscillating cells measured as a function of time from the same experiment as (A). (C & D) Distribution of  
87 oscillation frequencies before and after cyanide addition.

88

89 **Figure S10 –**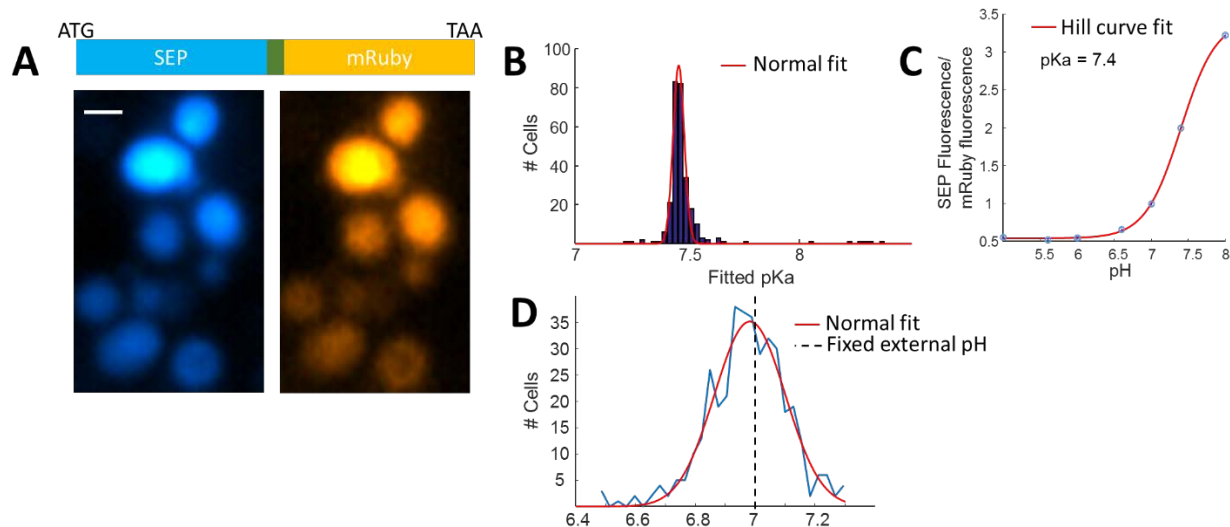

90  
 91 Figure S10 - (A) Construction of a ratiometric pH sensor using a fusion of SEP and mRuby3. Images  
 92 showing illumination with 488 nm (SEP) and 561 nm (mRuby). (B) To calibrate the sensor, each cell had  
 93 the SEP to mRuby ratio calculated across a range of pHs while cells were permeabilized with digitonin.  
 94 Each cell was fit to a hill curve which yielded a unique pKa. Each pKa was plotted in a histogram which  
 95 was fit to normal distribution with a population pKa of 7.4. (C) Data points for the population (blue dots)  
 96 and the hill curve fit (red line) to a pKa of 7.4. (D) A new set of cells was permeabilized and set to pH  
 97 7.0. Each cell was then fit using the parameters generated in B and the apparent pH was plotted as a  
 98 histogram. The histogram was fit to a normal distribution with a pH of 6.98 with a half width half maximum  
 99 of 0.18 pH units.

100

101 **Figure S11 –**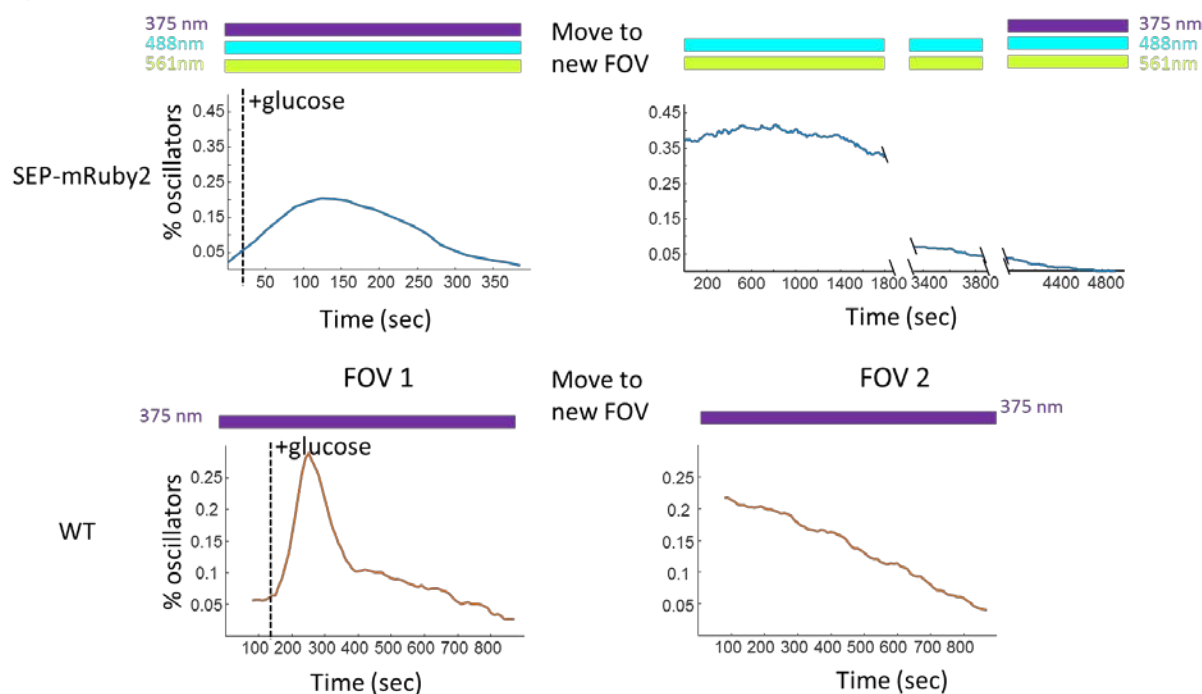

102  
 103 Figure S11 - UV light suppresses pH oscillations. (Top) The fraction of oscillating cells was calculated for  
 104 a population while simultaneously imaging SEP-mRuby and NADH autofluorescence. The fraction had  
 105 been reduced to < 5% within 5 minutes after glucose addition. Illumination of a new field of view of the  
 106 same pad showed that 40% of the cells were still oscillating when imaging with 488 nm and 561 nm light.  
 107 Cells continued to oscillate in the new field of view, reducing to 7% after 1 hour. However, the same field  
 108 of view exposed to UV eliminated all oscillators within 5 minutes. (Bottom) Non-expressing cells showed  
 109 oscillations that were also suppressed by UV light. Cells imaged with NADH autofluorescence initially  
 110 showed a high fraction of oscillating cells that quickly died down. A new field of view had high numbers  
 111 of oscillators that also decreased with time.  
 112

113 **Figure S12 –**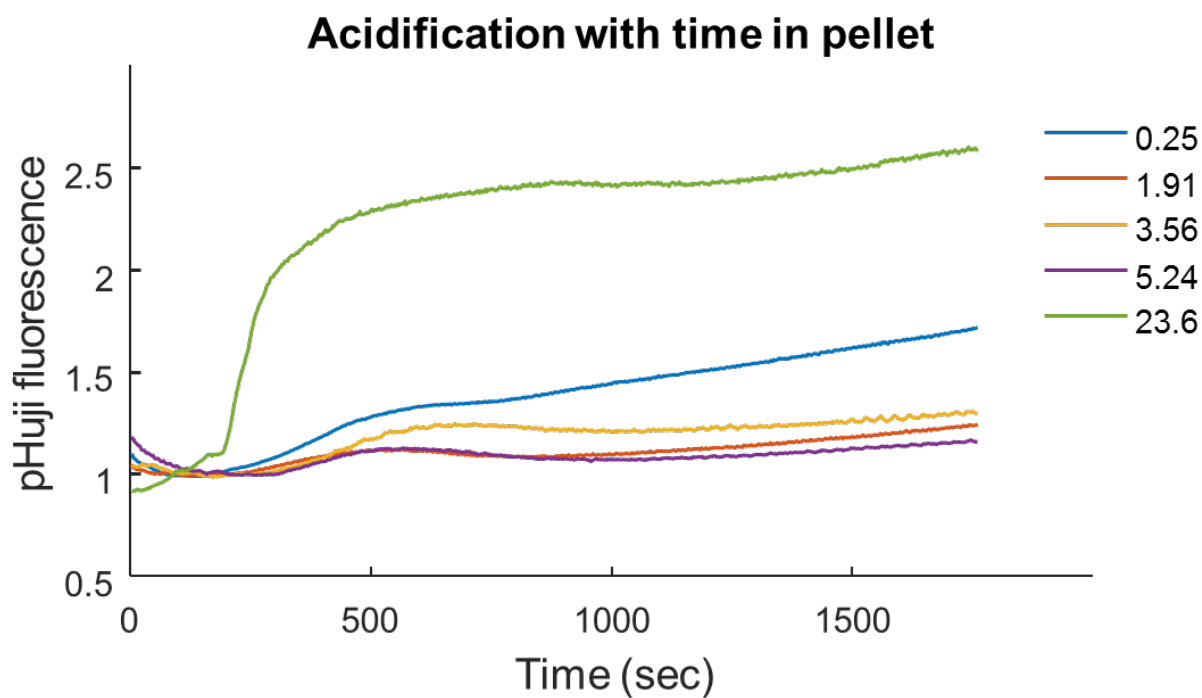

114  
115 Figure S12 – Increase in baseline fluorescence change upon glucose addition with increased time in the  
116 Eppendorf tube. The longer the cells remained sedimented in the pellet, the larger the increase in baseline  
117 fluorescence indicating an increased acidification of the cytoplasm. Data shown is the mean time trace of  
118 all cells in a field of view (> 300 for each condition).  
119

120 **Figure S13 -**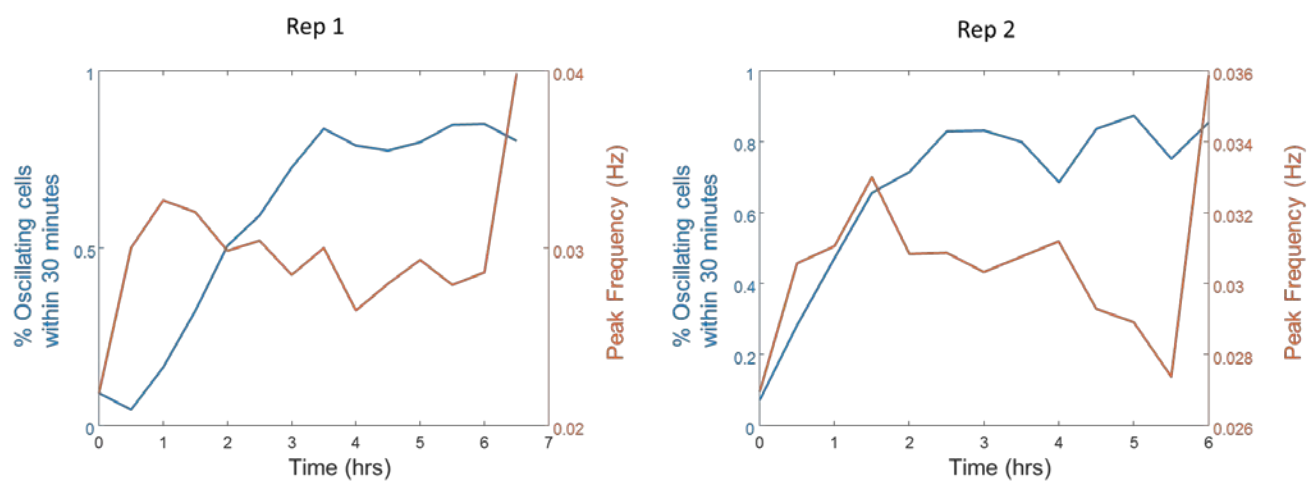

121  
 122 Figure S13 - Cells that are spun down in an Eppendorf tube show similar oscillation behaviors to cells left  
 123 to settle without spinning. Two replicates of the time in tube experiment showing an increase in the fraction  
 124 of oscillating cells with increased time incubating in the tube.

125 **Figure S14 –**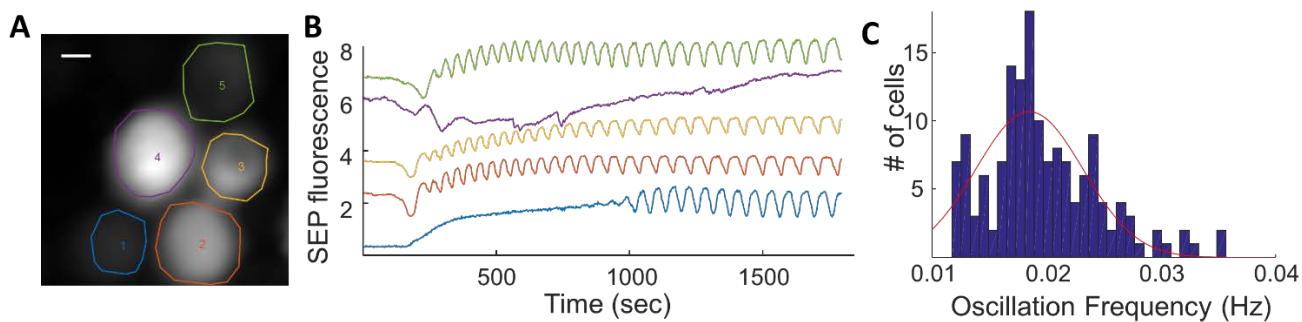126  
127  
128  
129  
130  
131  
132

Figure S14 - Yeast cells taken directly from a colony grown on agarose show oscillations. (A) Image of cells expressing SEP taken directly from a colony and placed on an agarose pad. Each color represents a manually selected ROI. Scale bar is 1  $\mu\text{m}$ . (B) Time trace of cells from (A) showing pH oscillations from cells taken directly from a colony and fed glucose. (C) Distribution of oscillation frequencies of cells taken directly from an agar plate.

133 **Figure S15 –**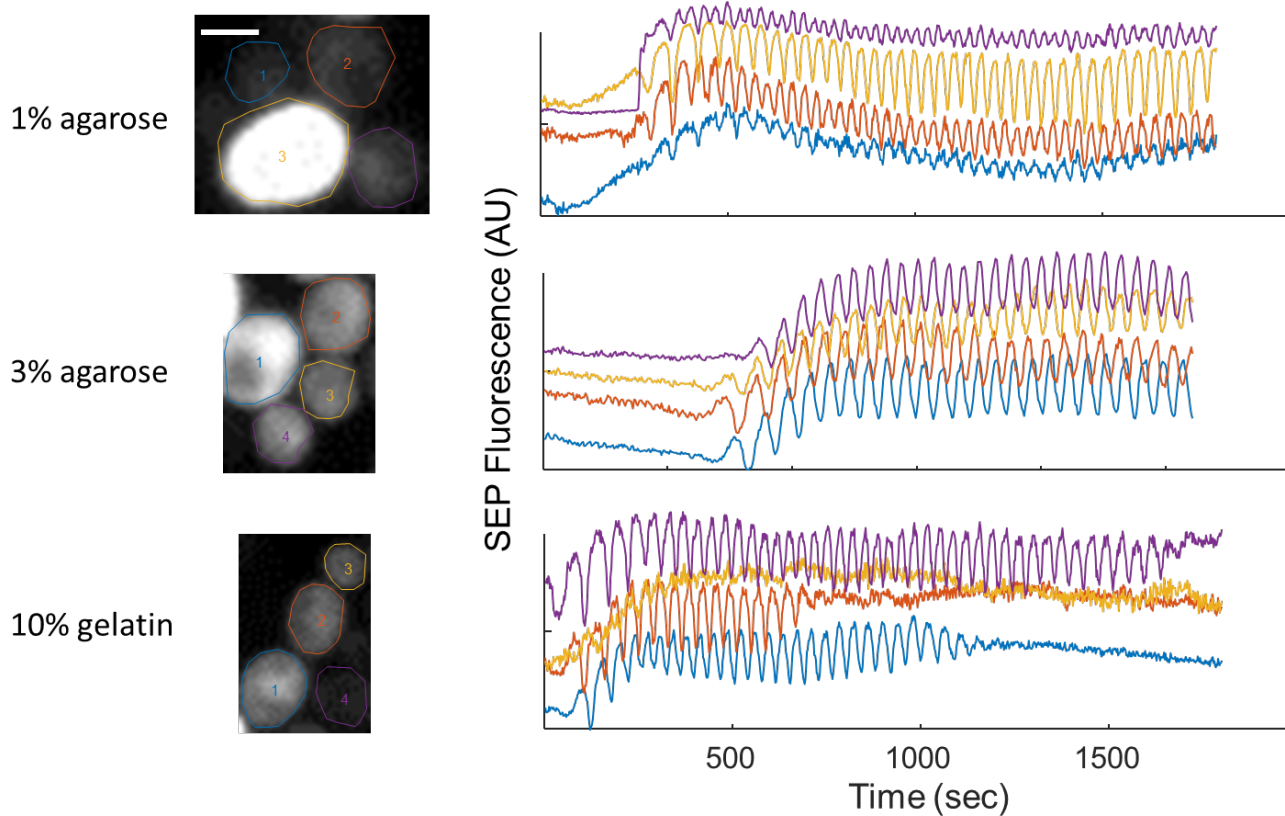

134  
 135 Figure S15 - The hydrogel substrate does not dictate the presence of oscillations. (Left) Images and  
 136 manually selected ROIs for cells immobilized under a 1% agarose pad (typical), 3% agarose pad, and 10%  
 137 gelatin pad. Each pad was made with PBS at the noted concentration. (Right) Time traces from each ROI  
 138 showing yeast cells undergo pH oscillations under each hydrogel. Scale bar is 2  $\mu\text{m}$ .

139



140 **Figure S16 –**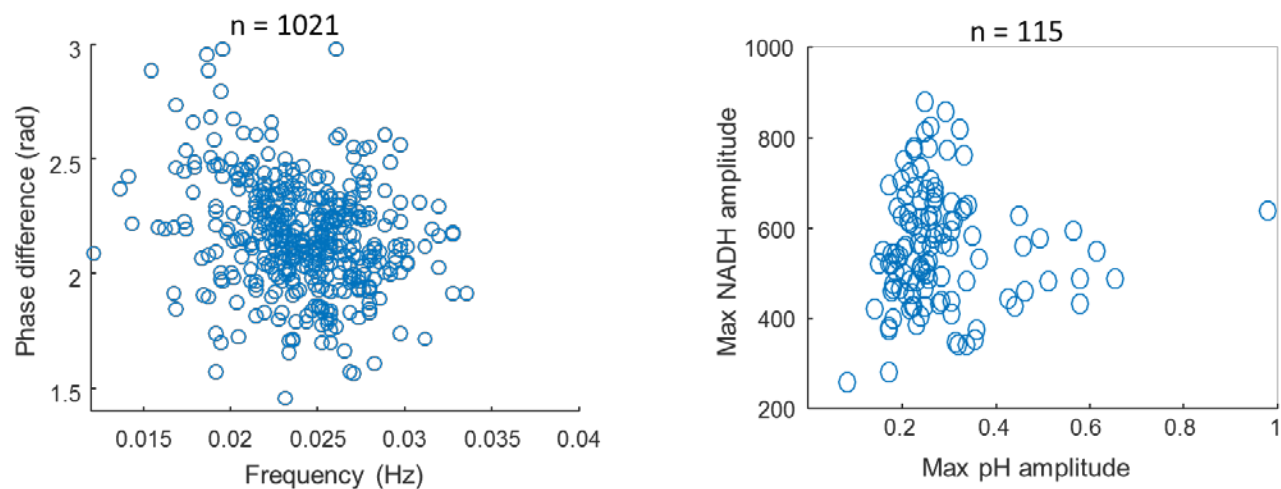

141  
142 Figure S16 - (A) Scatter plot of individual cells imaged with SEP-mRuby and NADH autofluorescence  
143 simultaneously. The frequency of each cell is plotted on the x-axis and the phase difference between the  
144 pH and NADH oscillations on the y-axis. (B) Under the same imaging conditions as (A), a scatter plot  
145 showing the maximum pH amplitude on the x-axis and the maximum NADH amplitude on the y-axis.  
146

147 **Figure S17 –**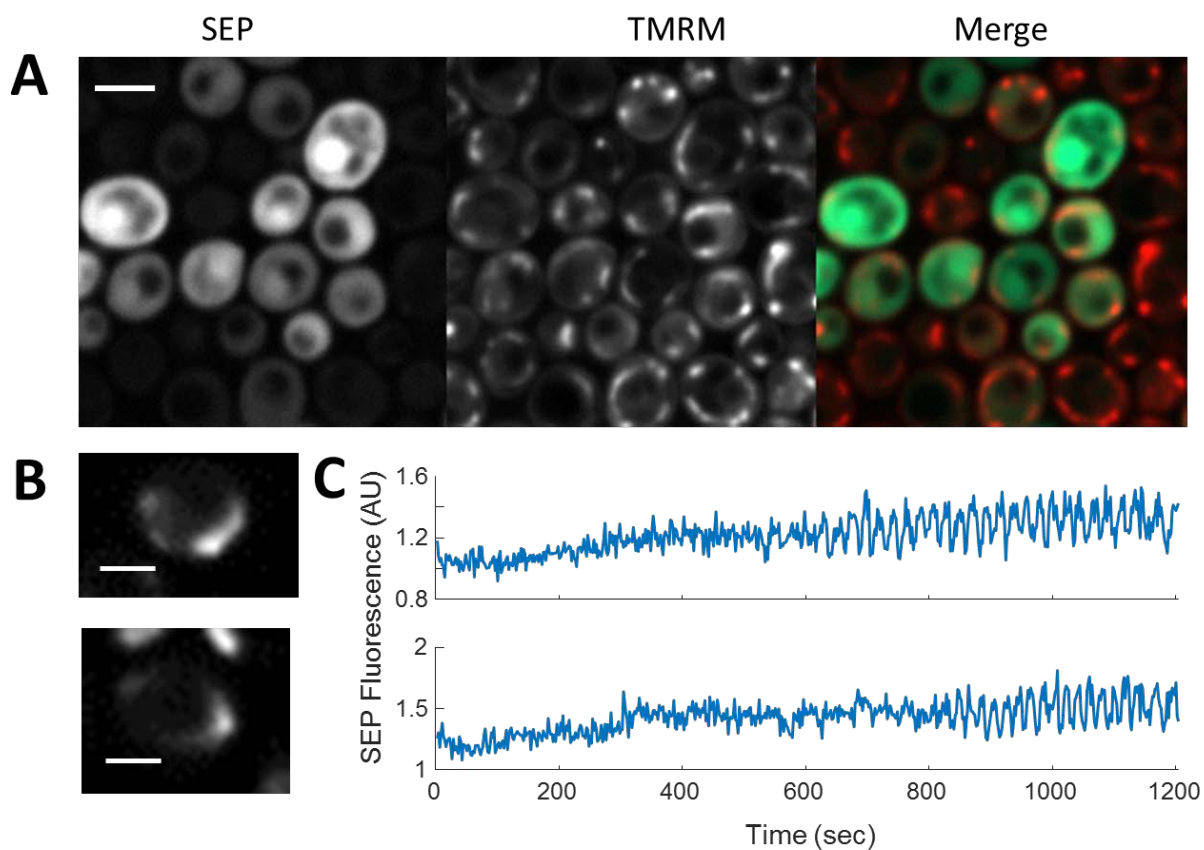

148  
 149 Figure S17 – Mitochondrial matrix pH oscillates in cells undergoing cytoplasmic pH oscillations. (A)  
 150 Images of yeast cells expressing cytoplasmic SEP and incubated with the membrane permeable dye TMRM.  
 151 SEP (imaged at 488 nm) and TMRM (imaged at 561 nm) do not show any spectral cross talk, and the  
 152 TMRM clearly stains mitochondria. Scale bar is 3  $\mu\text{m}$ . (B) Images of yeast cells expressing a  
 153 mitochondrially targeted SEP. Scale bar is 2  $\mu\text{m}$ . (C) Time traces of each cell from (B) showing  
 154 mitochondrial pH oscillates after the addition of glucose, similar to the cytoplasmic pH.  
 155

156 **Figure S18 –**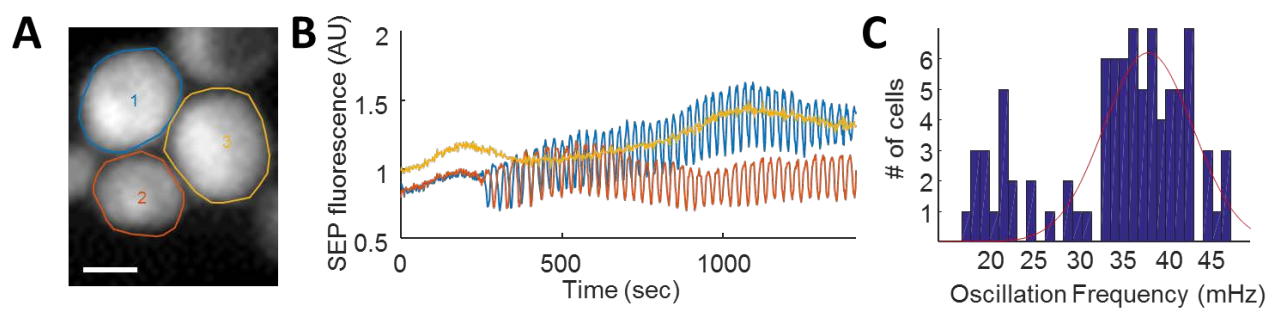

157  
158 Figure S18 - (A) Image of Vma2KO cells expressing SEP with manually selected ROIs. Scale bar is 3  $\mu\text{m}$ .  
159 (B) Time traces of ROIs from the selected regions in (A). (C) Frequency distribution of oscillating cells  
160 containing a Vma2 KO.

161  
162

163 **Figure S19 –**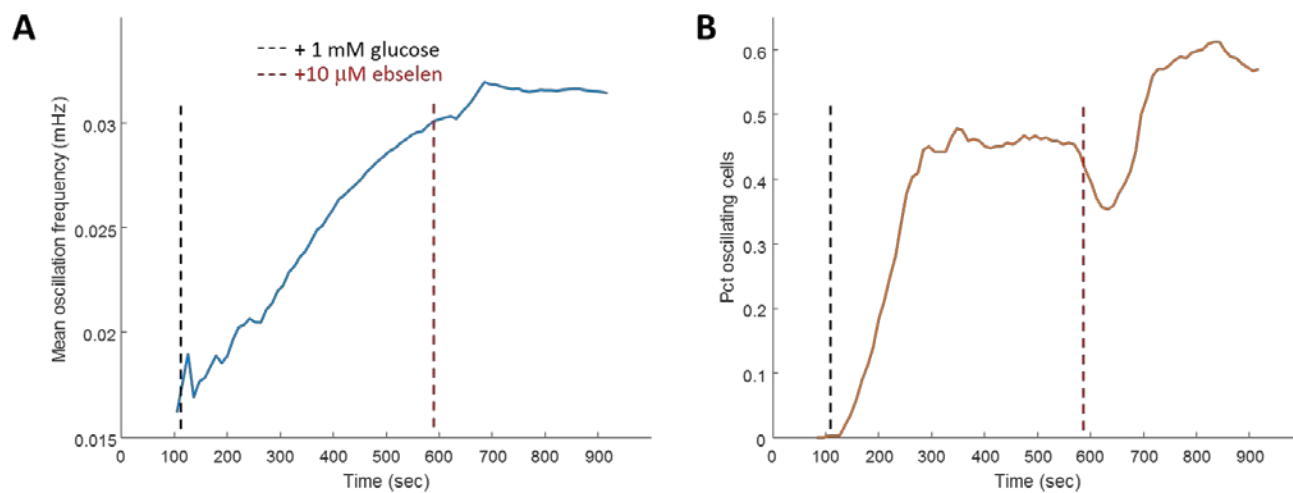

164  
165 Figure S19 – (A) Addition of 10  $\mu$ m ebselen caused an increase in the oscillation frequency. Data shown  
166 is the mean frequency of all oscillating cells in a FOV. (B) The percentage of oscillating cells increased  
167 upon addition of 10  $\mu$ m ebselen.  
168  
169

170 **Figure S20 –**

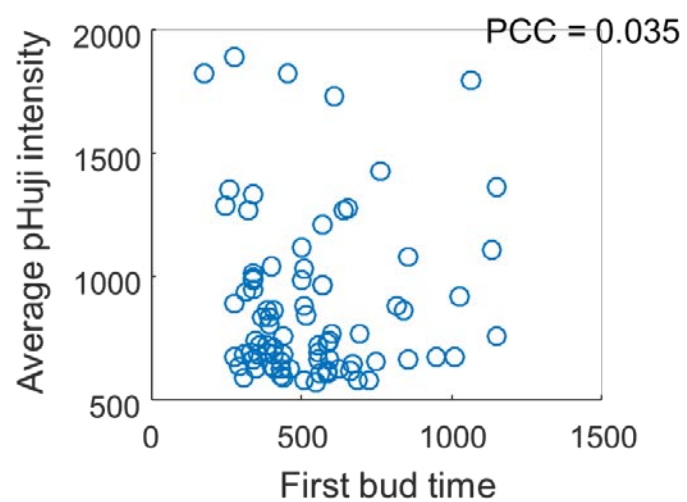

171  
172 Figure S20 – Scatter plot comparing the mean pHuji intensity to the first appearance of a bud for individual  
173 cells. There is low correlation between the mean pHuji intensity and the time to bud.  
174
